# Supplementary material for: Electronic and optical properties of hydrogen-terminated biphenylene nanoribbons: a first-principles study
Source: Royal Society of Chemistry journal article supplement (doi:10.1039/d1cp04481h), 2021-11-26
Supplement: d1cp04481h1.pdf [file d1cp04481h1.pdf]

## Supporting Information

### Electronic and optical properties of hydrogen-terminated biphenylene nanoribbon : a first-principles study

Hong Shen<sup>1</sup>, Riyi Yang<sup>1</sup>, Kun Xie<sup>1</sup>, Zhiyuan Yu<sup>1</sup>, Yuxiang Zheng<sup>1</sup>, Rongjun Zhang<sup>1</sup>, Liangyao Chen<sup>1</sup>, Bi-Ru Wu<sup>2</sup> and Wan-Sheng Su<sup>3,4,\*</sup>, Songyou Wang<sup>1,5,6,\*</sup>

<sup>1</sup>Shanghai Ultra-Precision Optical Manufacturing Engineering Center, Department of Optical Science and Engineering, Fudan University, Shanghai 200433, China

<sup>2</sup>Division of Natural Science, Center for General Education, Chang Gung University, Tao-Yuan 33302, Taiwan

<sup>3</sup>National Taiwan Science Education Center, Taipei 11165, Taiwan.

<sup>4</sup>Department of Electro-Optical Engineering, National Taipei University of Technology, Taipei 10608, Taiwan

<sup>5</sup>Key Laboratory for Information Science of Electromagnetic Waves (MoE), Shanghai 200433, China

<sup>6</sup>Yiwu Research Institution of Fudan University, Yiwu 322000, China

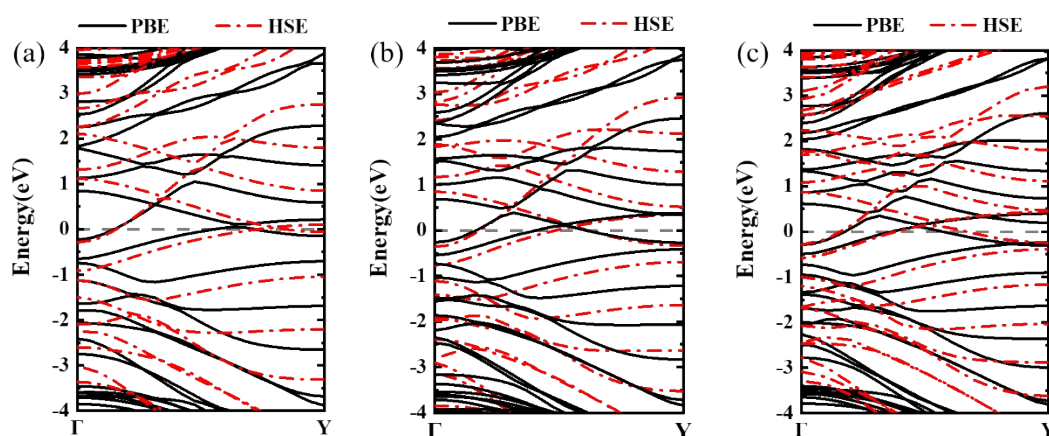

**Figure S1.** Band structures of nanoribbons with widths of (a) 15-ABNR, (b) 18-ABNR, and (c) 21-ABNR. The PBE and HSE06 band structures are represented by solid and dashed lines, respectively.

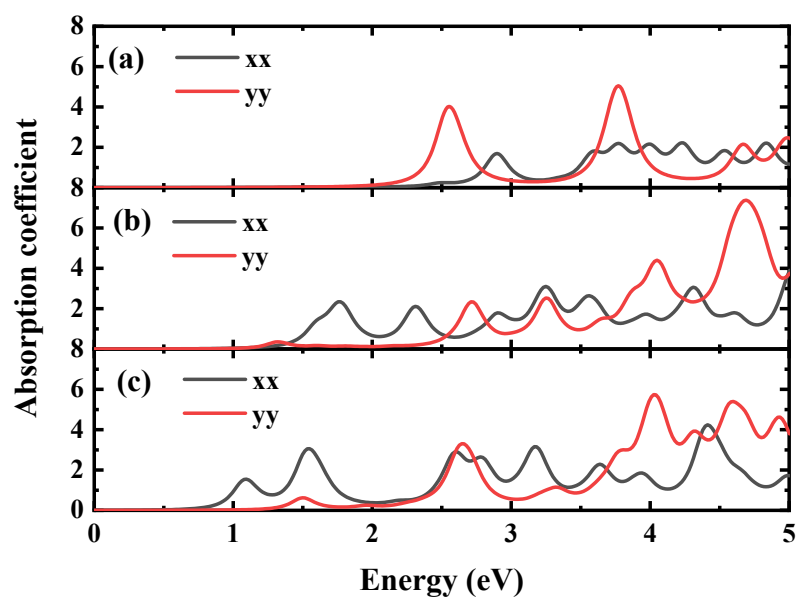

**Figure S2.** The x and y component of the absorption coefficients of (a) 6-ABNR, (b) 9-ABNR and (c) 12-ABNR.
